# Supplementary material
Source: ML conference proceedings conference paper supplement (https://proceedings.mlr.press/v89/katz19a.html)
Supplement: Supplementary file [file katz19a-supp.pdf]

## A Meek Orientation Rules

In Figure 3, we provide the four Meek orientation rules that are used in the definition of the essential graph.

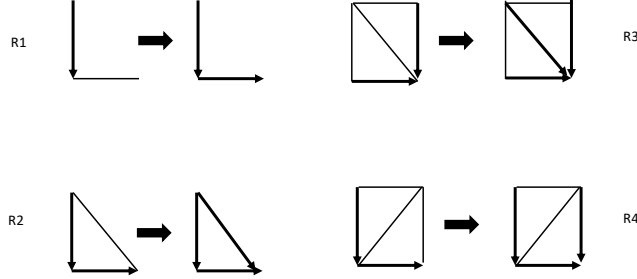

Figure 3: Meek orientation rules used to direct edges in the interventional essential graph representing the  $I$ -MEC.

The following two observable properties play an important role in various results in the main paper.

**Property 1.** *If a node  $v$  is involved in any of the four Meek rules and if the node  $v$  does not have an outgoing edge in the original causal DAG, then the oriented edge (in the right hand side motif of any of the four rules in Figure 3) is incident to  $v$ .*

**Property 2.** *If a node  $v$  is involved in a motif for any of the four rules, then either  $v$  has an outgoing edge or it has an adjacent undirected edge (on the left hand side motif appearing in that rule).*

## B Additional Proofs

### B.1 Proof of Lemma 1

Observe that all edges between  $G_n$  and  $v_{n+1}$  are directed to  $v_{n+1}$  and that  $v_{n+1}$  does not have any outgoing edges. Suppose that  $v_{n+1}$  is involved in one of the four Meek rules in Appendix A. Then by Property 1 in Appendix A, the discovered edge has to be incident to  $v_{n+1}$ . On the other hand, if  $v_{n+1}$  is not part of any Meek rule, then the rules must have already been applied in  $G_n$  to orient edges maximally, which completes the proof.

### B.2 Proof of Lemma 2

The proof is similar to the proof of Lemma 1, i.e. it follows from Property 1 in Appendix A.

### B.3 Proof of Equation 1

We can simplify this sum as follows:

$$\begin{aligned} \sum_{i \geq n} ix^{i-1} &= \frac{d}{dx} \left( \sum_{i \geq n} x^i \right) \\ &= \frac{d}{dx} \frac{x^n}{1-x} \\ &= \frac{x^n}{(1-x)^2} + nx^{n-1} \frac{1}{1-x} \end{aligned}$$

Substituting  $(1 - \rho(1 - \rho))$  for  $x$ , we obtain

$$\begin{aligned} \sum_{i=n}^{\infty} \rho^i * (1 - \rho(1 - \rho))^{i-1} &= \rho \left[ \frac{(1 - \rho(1 - \rho))^n}{\rho^2(1 - \rho)^2} + \right. \\ &\quad \left. n \frac{(1 - \rho(1 - \rho))^{n-1}}{\rho(1 - \rho)} \right] \\ &= \frac{(1 - \rho(1 - \rho))^n}{\rho(1 - \rho)^2} + \\ &\quad n \frac{(1 - \rho(1 - \rho))^{n-1}}{(1 - \rho)} \end{aligned}$$

### B.4 Proof of Lemma 3

Suppose  $v_n \notin J$ , then by Property 2, it cannot be part of any of the Meek rules in Appendix A. Therefore, it cannot aid in any of the rule applications after new edges have been discovered by interventions in  $J$ . This means that removing it before or after applying the Meek rules is irrelevant. Hence  $J(G \setminus v_n) = J(G) \setminus v_n$ . If  $v_n \in J$ , then the intervention on  $v_n$  gives no additional information as all its adjacent edges have already been discovered and hence it is equivalent to using  $J \setminus v_n$ . Hence, this reduces to the previous case with  $J$  replaced by  $J \setminus v_n$  and thereby completes the proof.

### B.5 Proof of Theorem 2

- This follows directly from Lemma 1.
- Suppose the MEC of  $G_n$  is given by the DAG set  $\{H_1, H_2, \dots, H_k\}$ . For each  $i$ , let  $H'_i$  be the DAG  $H_i$  extended by adding the vertex  $v_{n+1}$ , with the same incoming edges as it has in  $G_{n+1}$ . From Lemma 1, it follows that the DAGs  $\{H'_1, H'_2, \dots, H'_k\}$  are contained in the MEC of  $G_{n+1}$ .
- Due to the coupling, if a set of interventions orients  $G_{n+1}$ , it also orients  $G_n$ . The result follows.

The results for the expected values follow from the almost sure results.

### B.6 Proof of Theorem 3

Let  $R$  be the set of interventions that achieves the minimum number  $X_{n+1}(r)$  of unoriented edges in  $G_{n+1}$

and let  $|R| = r$ . We apply the same set of interventions to  $G_n$  barring the possible intervention on node  $v_{n+1}$ . By Lemma 2, all edges unorientable in  $G_n$  after these ‘copied’ interventions are also unorientable in  $G_{n+1}$  even with/without the possible additional intervention on  $v_{n+1}$ . Since we can (possibly) add the extra intervention in  $G_n$  to bring the total number to  $r$ , this means that after these  $r$  interventions on  $G_n$  we have at most  $X_{n+1}(r)$  unorientable edges in  $G_n$ , which completes the proof.

### B.7 Proof of Theorem 5

Let  $R$  be the set of optimal set of  $r$  interventions on  $G_{n+1}$  that orient the maximum number of edges in the  $\text{Ess}(G_{n+1}, R)$ . Therefore,  $|\text{Ess}(G_{n+1}, R)| = L_{n+1}(r)$ . Let  $R' = R \setminus v_{n+1}$ . Suppose the  $\text{Ess}(G_n, R')$  is given by the DAG set  $\{H_1, H_2, \dots, H_k\}$ . For each  $i$ , let  $H'_i$  be the DAG  $H_i$  extended by adding the vertex  $v_{n+1}$ , with the same incoming edges as in  $G_{n+1}$ . From Lemma 2, it follows that the DAGs  $\{H'_1, H'_2, \dots, H'_k\}$  are contained in  $\text{Ess}(G_{n+1}, R)$ . This means, that,  $L_n(r) \leq |\text{Ess}(G_n, R')| \leq |\text{Ess}(G_{n+1}, R)| = L_{n+1}(r)$

### B.8 Proof of Theorem 6

For all monotonic sequences  $\{x_n\}$ ,

$$\liminf\{x_n\} = \limsup\{x_n\} = \lim\{x_n\}.$$

Further, when a sequence of measurable functions  $\{f_n\}$  converges pointwise to a function  $f$ , then  $f$  is also measurable. Here,  $X_n$  is a measurable function of the random variables  $G_n$ . Hence,  $\mathbb{E}[X_\infty] = \lim_{n \rightarrow \infty} \mathbb{E}[X_n]$  follows from the Lebesgue Monotone Convergence Theorem.

### B.9 Proof of Theorem 7

We first prove the following Lemma. The theorem follows from the Lemma.

**Lemma 5.**  $\mathbb{E}(X_{n+1}) - \mathbb{E}(X_n) \leq \rho n * (1 - \rho(1 - \rho))^{n-1}$ .

*Proof.* Observe that the left hand side equals the expected number of unorientable edges incident to  $v_{n+1}$  in  $G_{n+1}$  by Lemma 1. We will upper bound this number as follows:

For each vertex  $i$  the edge  $(i, n+1)$  is unoriented if it is present (probability  $\rho$ ), and not part of an uncovered collider. The probability that  $(i, n+1)$  and  $(j, n+1)$  form an uncovered collider given  $(i, n+1)$  is present is  $\rho(1 - \rho)$ , and such probabilities for different  $j$  are independent. Thus the probability that  $(i, n+1)$  is not part of an uncovered collider given that it is present is  $(1 - \rho(1 - \rho))^{n-1}$ . Multiplying by  $\rho$  for the probability

that  $(i, n+1)$  is present, and by  $n$  for the total number of such potential edges leads to the desired bound.  $\square$

### B.10 Proof of Theorem 8

Since the unoriented edges incident to  $v_{n+1}$  can be oriented with at most one intervention each, we have that  $I_{n+1} - I_n \leq X_{n+1} - X_n$ . This, combined with Theorem 7 results in the desired bound.

### B.11 Proof of Theorem 11

If  $A_{i,n} = 1$ , and for all  $j \neq \{i, n\}$  it holds that  $A_{i,j} = A_{j,n} = 0$ , then the edge  $(i, n)$  is isolated and thus unorientable. That happens with probability  $\rho(1 - \rho)^{n-2}(1 - \rho)^{n-2}$  for each  $i$ . Note that there are  $n - 1$  such potential edges that are adjacent to vertex  $v_n$  and therefore figure into  $\mathbb{E}(X_n) - \mathbb{E}(X_{n-1})$ , which completes the proof.

### B.12 Proof of Theorem 9

We provide a lemma and its proof regarding successive differences of the interventional metric  $X_n(r)$ . The result in the theorem follows immediately from this.

**Lemma 6.**  $\mathbb{E}(X_{n+1}(r)) - \mathbb{E}(X_n(r)) \leq \rho n * (1 - \rho(1 - \rho))^{n-1}$ .

*Proof.* Let  $X'_{n+1}(r)$  be the number of unoriented edges in  $G_{n+1}$  after we apply  $r$  interventions that achieve  $X_n(r)$  unoriented edges in  $G_n$ . Observe that  $X_{n+1}(r) \leq X'_{n+1}(r)$ . Since we can show that  $\mathbb{E}(X'_{n+1}(r)) - \mathbb{E}(X_n(r)) \leq \rho n * (1 - \rho(1 - \rho))^{n-1}$  by following the proof of Lemma 5 in the proof of Theorem 7, this completes the proof.  $\square$

### B.13 Proof of Theorem 10

Observe that  $isuEss_n(r) - isuEss_{n+1}(r) \leq X_{n+1}(r) - X_n(r)$ , because  $isuEss_n(r) - isuEss_{n+1}(r)$  is either 0 or 1 (it cannot be -1 by Theorem 4), and can only be 1 if  $X_{n+1}(r) > X_n(r)$ . This, combined with Lemma 6 means that  $\mathbb{E}(isuEss_n(r)) - \mathbb{E}(isuEss_{n+1}(r)) \leq \rho i * (1 - \rho(1 - \rho))^{n-1}$ , which provides the necessary bound.

### B.14 Proof of Theorem 12

It follows from the proof of Lemma 5 that the probability that  $v_{n+1}$  has an undirected edge is less than  $\text{RHS}(\rho, n)$ . If  $v_{n+1}$  does not have an undirected edge, then, by the fact that  $A$  is a downstream independent algorithm it follows that  $E(Y(r, A)_{n+1}) = E(Y(r, A)_n)$ , and therefore that  $\mathbb{E}(Y(r, A)_{n+1}) - \mathbb{E}(Y(r, A)_n) = 0$ . If  $v_n$  is adjacent to undirected edges, then

$\mathbb{E}(Y(r, A)_{n+1} - \mathbb{E}(Y(r, A)_n) < n(n + 1)/2$ , the number of possible edges in  $G_{n+1}$ . The bound follows since this happens with probability  $< \rho n * (1 - \rho(1 - \rho))^{n-1}$ .

### B.15 Proof of Theorem 14

We consider the following bound for  $\rho = 0.5$  from Theorem 1:

$$E[L_\infty] \leq E[X_\infty] \leq E[X_{30}] + \epsilon_{30}. \quad (3)$$

$\epsilon_{30} < 0.02$  (by direct calculation) based on Lemma ??.

Now, we apply the following theorem from (quoted with appropriate modifications for a random variable taking values in  $[0, B]$ ).

**Theorem 15.** (*Maurer and Pontil, 2009*) *If  $Z_1, Z_2 \dots Z_s$  are i.i.d random variables each bounded in  $[0, B]$ . Let  $M$  be the empirical mean and  $V$  be the empirical variance of the samples. Then, with probability  $1 - \delta$ ,*

$$E[Z] \leq M + \sqrt{\frac{2V \log(2/\delta)}{s}} + B \frac{7 \log(2/\delta)}{3(s-1)} \quad (4)$$

Now, for  $X_{30}$ ,  $B = 450$ . Substituting  $V = 7.054$ ,  $M = 3.394$ ,  $\delta = 0.01$  in the above theorem and using (3) we have the bound in the theorem.

## C Additional Figures

The additional figures regarding numerical simulations are given on the next page.

## Size of I-MECs in random DAG models

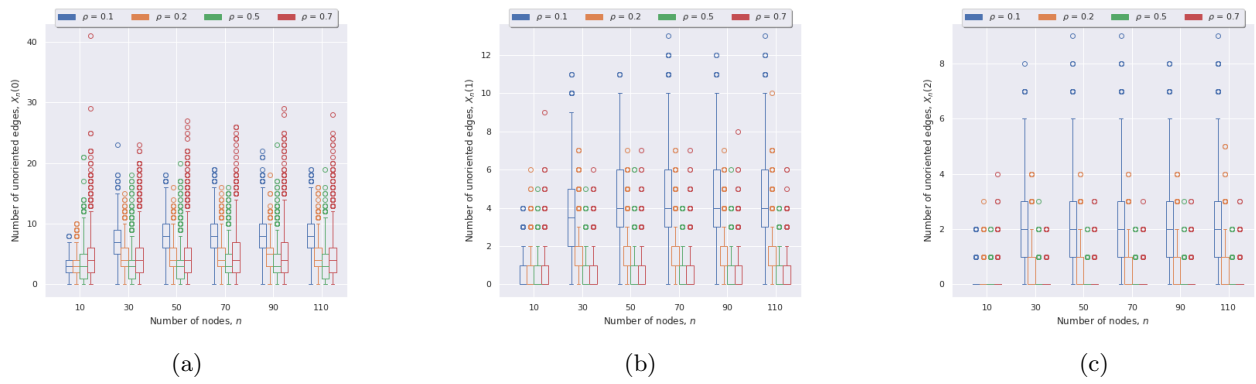

Figure 4: Number of unoriented edges of the 2,000 orderDAG samples. The middle line of the box is the median, the upper and lower edges are the upper and lower quartiles, and the circles are outliers.

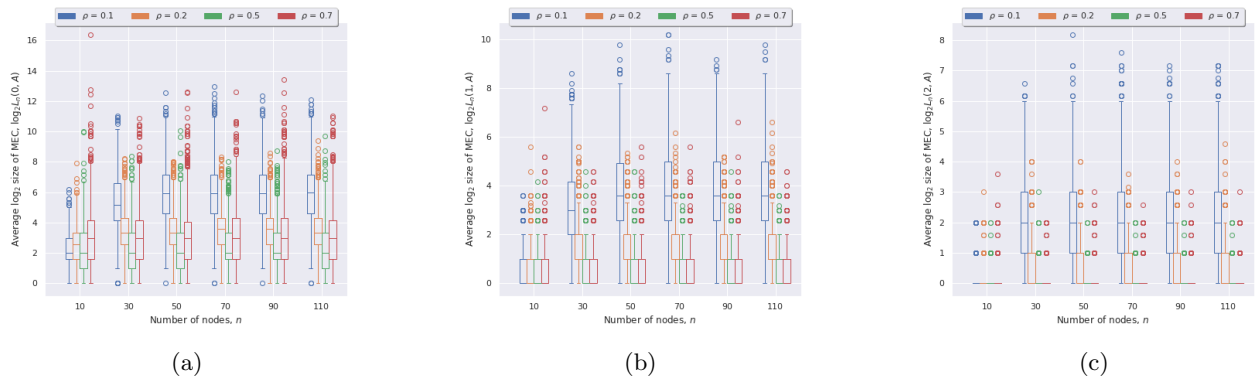

Figure 5:  $\log_2$  MEC sizes of the 2,000 orderDAG samples. The middle line of the box is the median, the upper and lower edges are the upper and lower quartiles, and the circles are outliers.
